# Supplementary material
Source: publisher site journal article supplement (https://www.dovepress.com/article/565217)

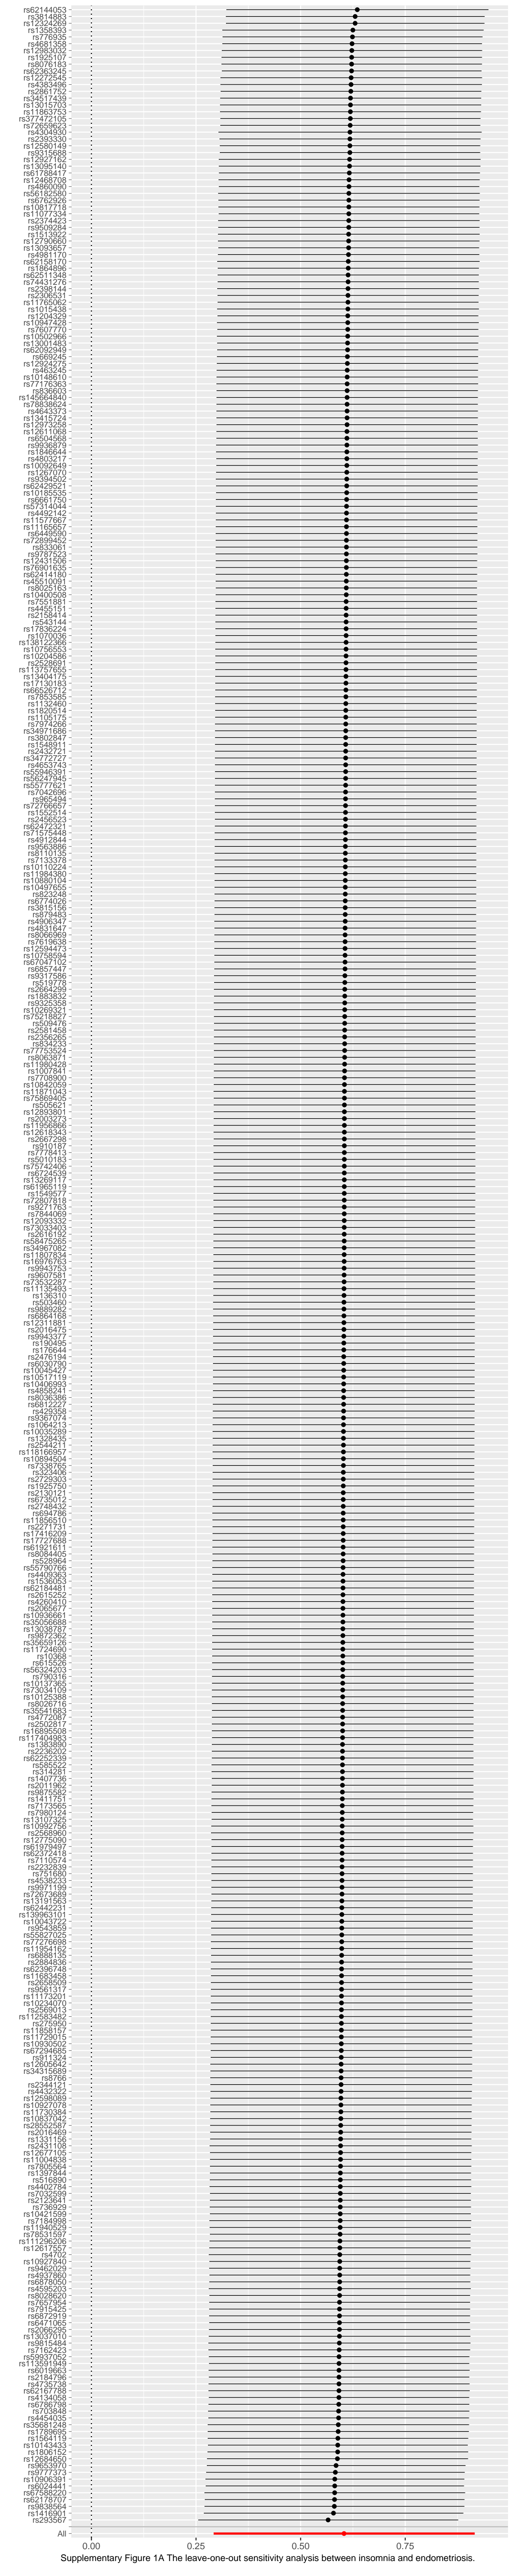

Supplementary Figure 1A The leave-one-out sensitivity analysis between insomnia and endometriosis.

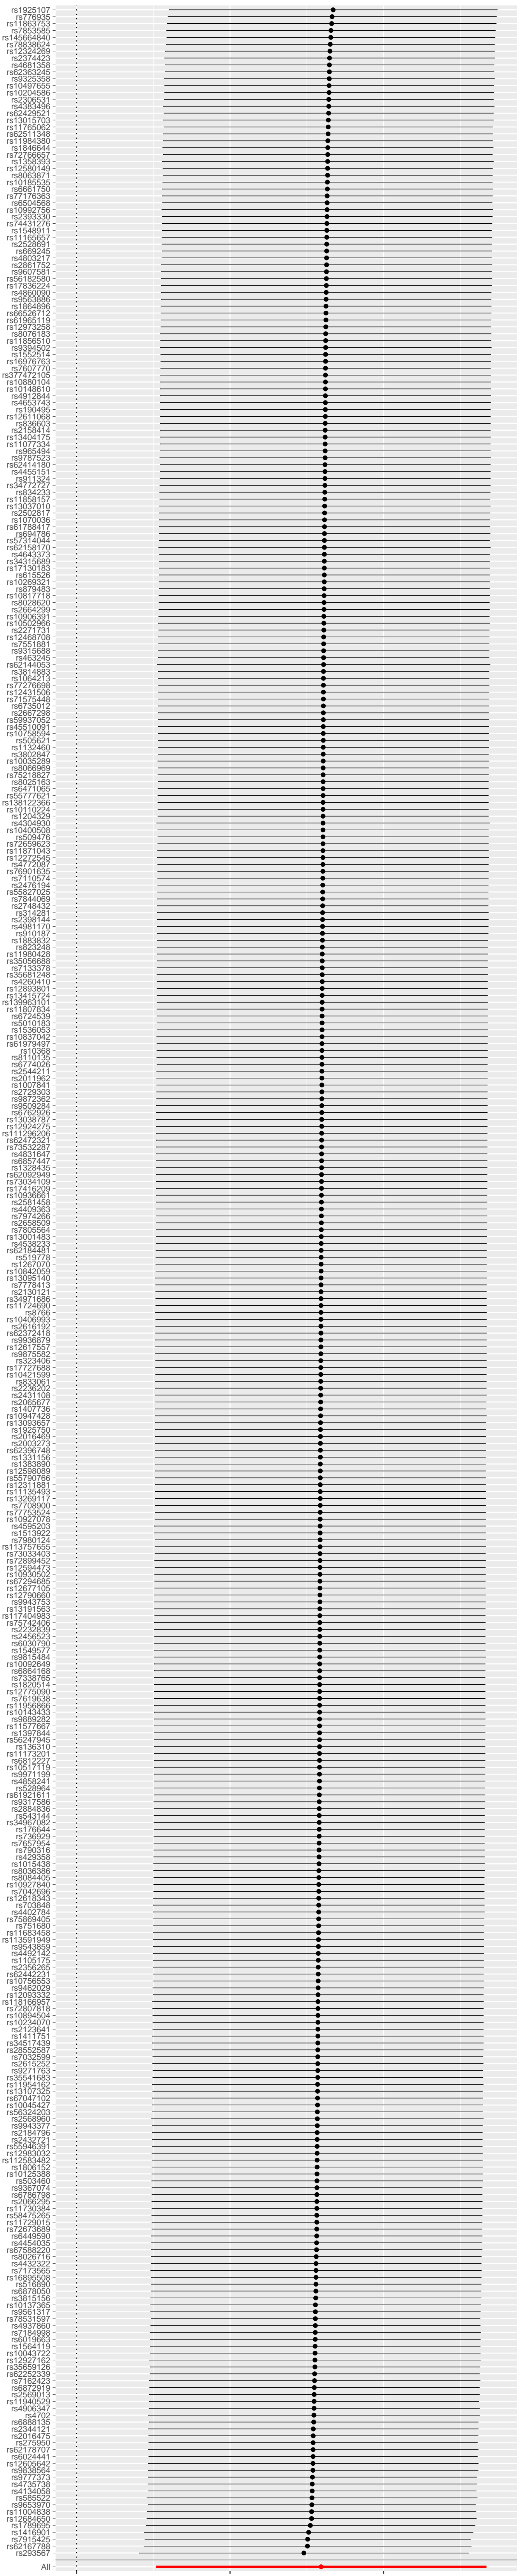

Supplementary Figure 1B The leave-one-out sensitivity analysis between insomnia and uterus endometriosis.



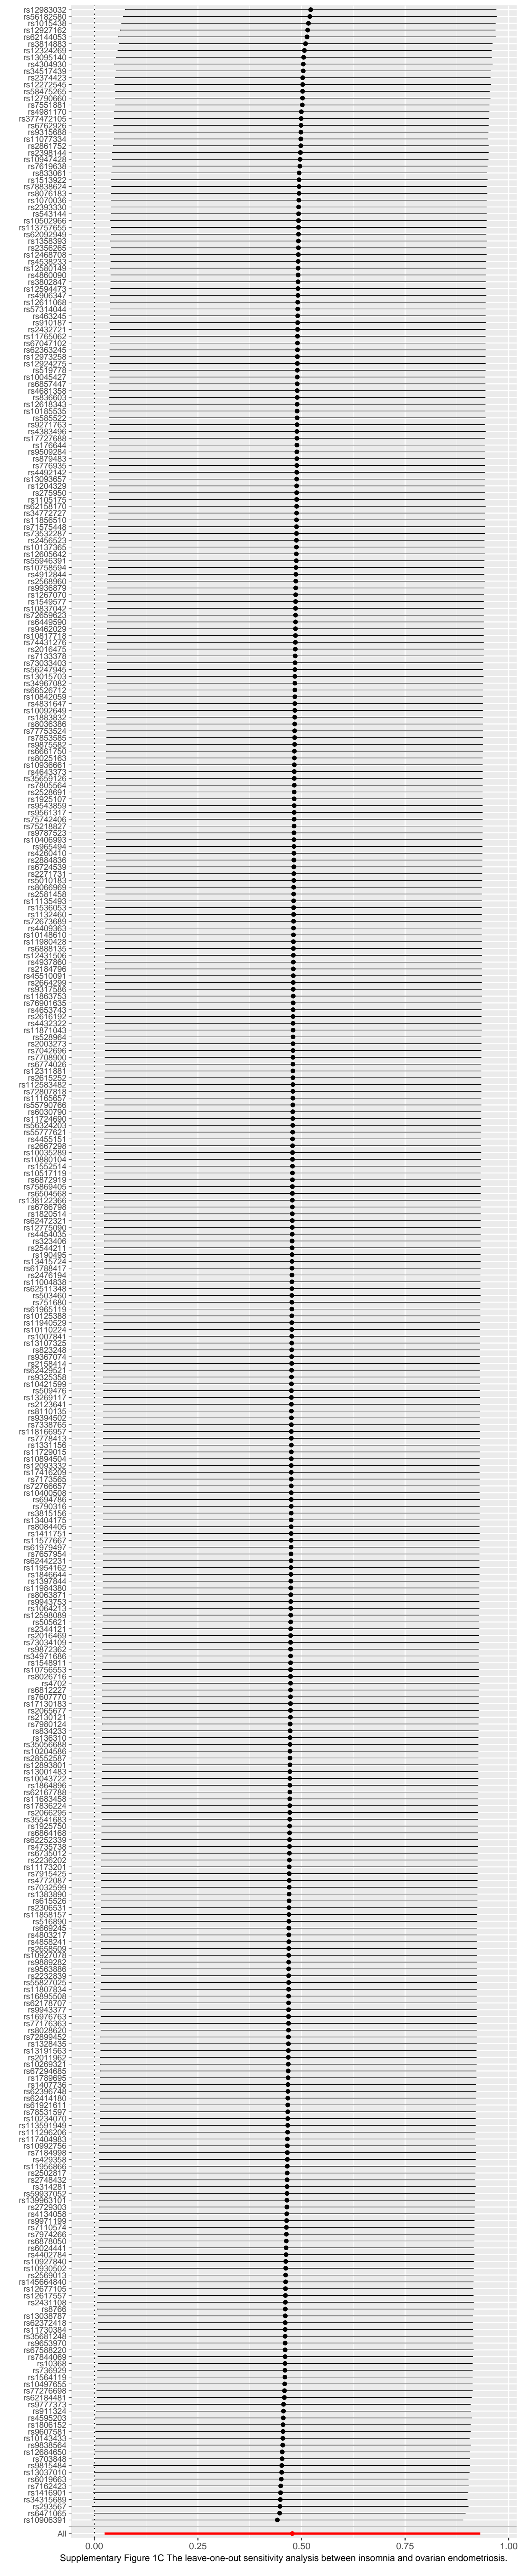

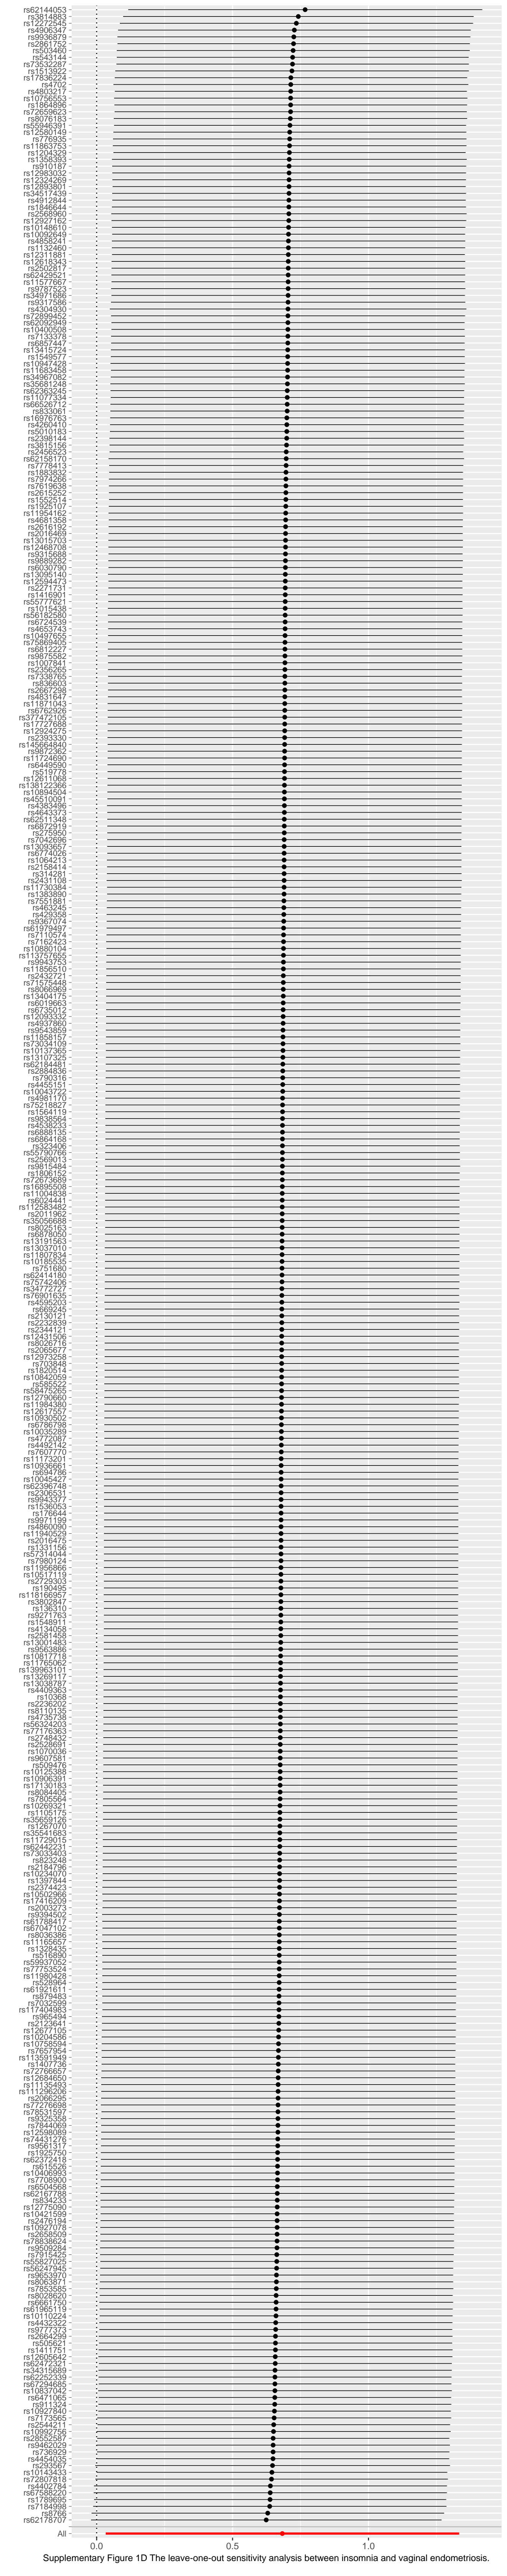

Supplementary Figure 1D The leave-one-out sensitivity analysis between insomnia and vaginal endometriosis.



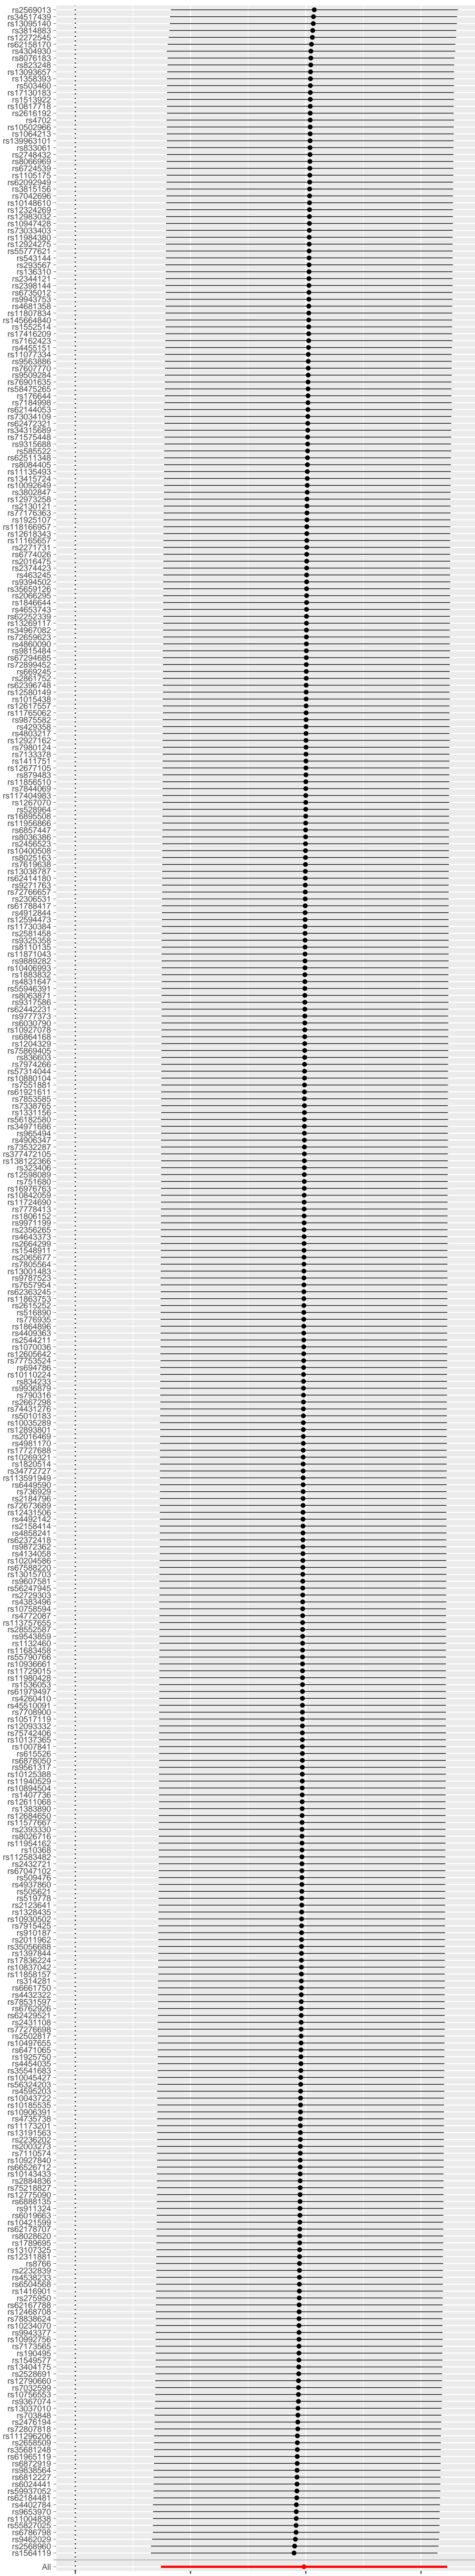

Supplementary Figure 1E The leave-one-out sensitivity analysis between insomnia and unspecified endometriosis.

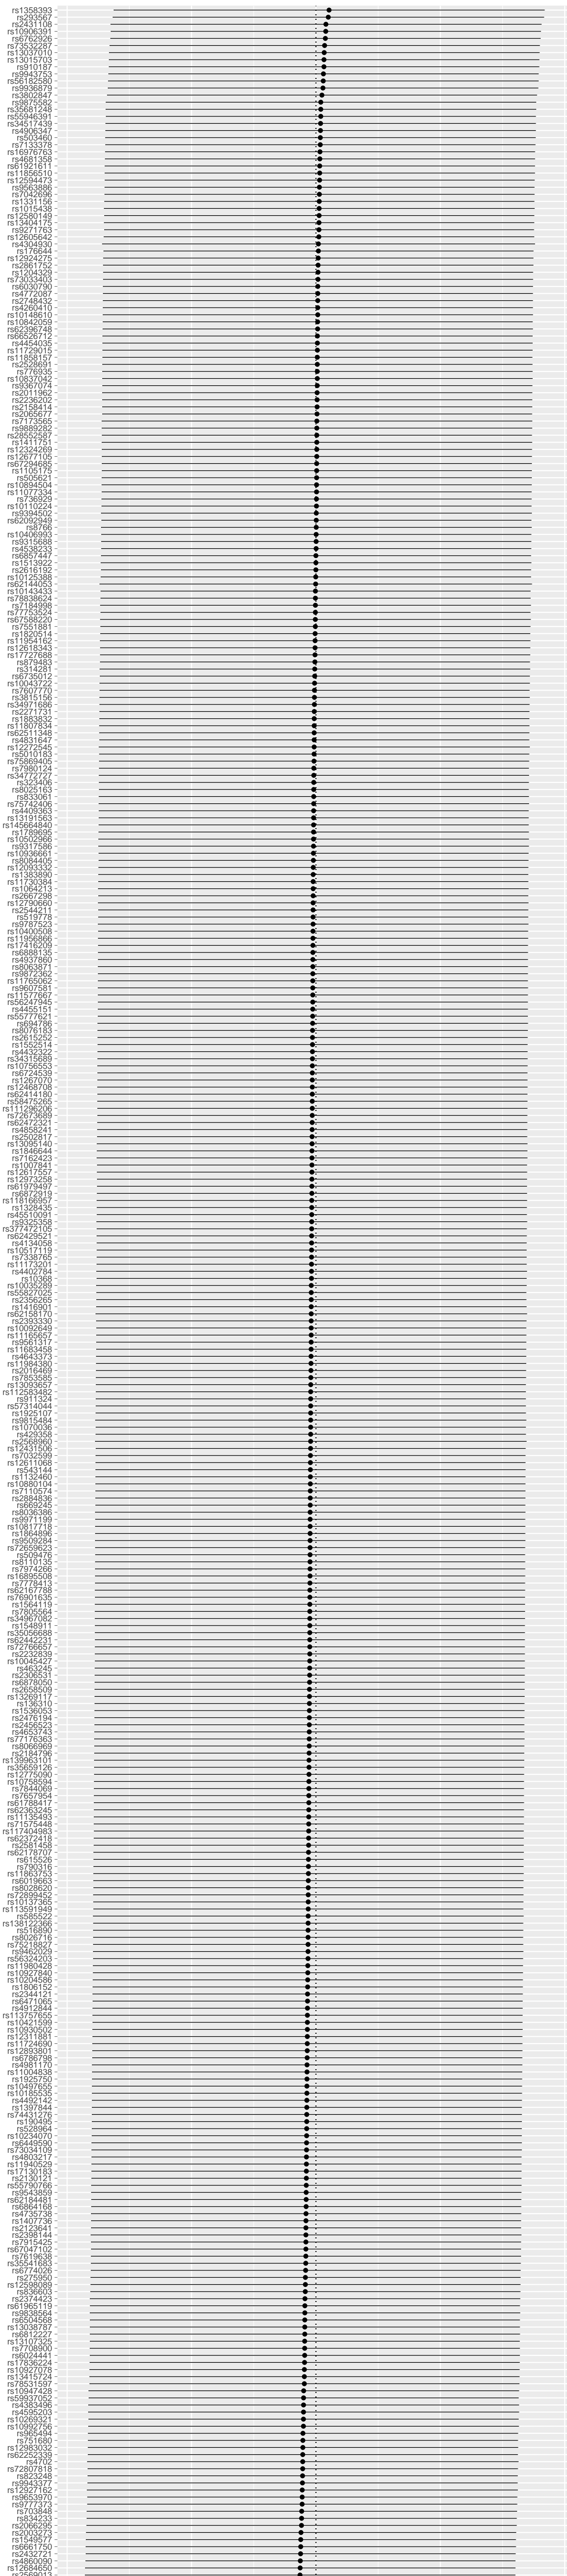

Supplementary Figure 1F The leave-one-out sensitivity analysis between insomnia and intestinal endometriosis.



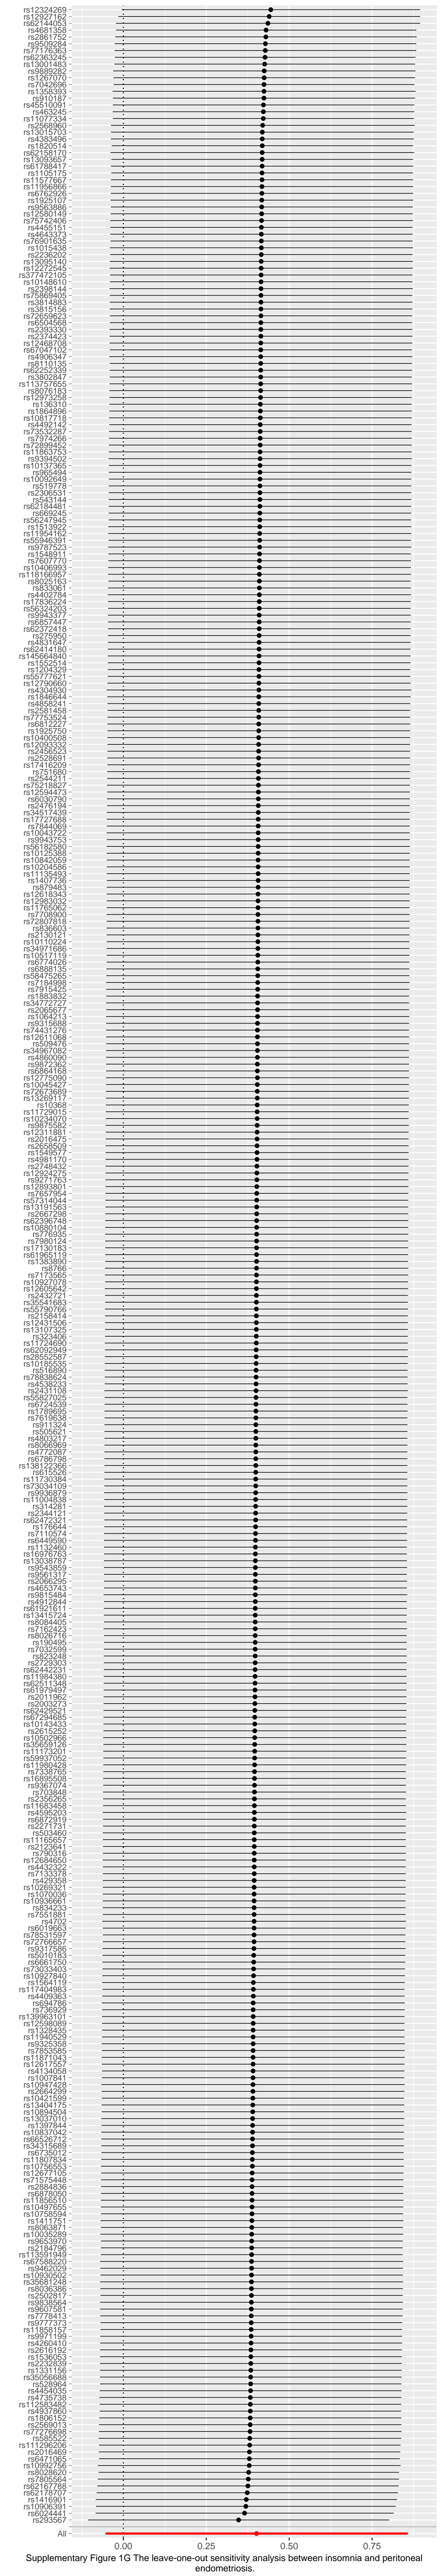

Supplement: Supplementary file 1 [file Supplementary Figures.pdf › Supplementary Figures.pdf]
